# Supplementary material for: Efficacy and safety of bevacizumab biosimilar compared with reference bevacizumab in locally advanced and advanced non-small cell lung cancer patients: A retrospective study
Source: Research Square preprint supplement (doi:10.21203/rs.3.rs-1943971/v1), 2022-08-11
Supplement: Supplementary file 1 [file 228b713cc0e8d1144f7455d7.xlsx]

## Sheet: Sheet1
Table 3 Subgroup analysis of ORR and DCR between and within biosimilar and referrence groups
	ORR(%)						DCR(%)
Variable	biosimilar group	p1	reference group	p2	p3		biosimilar group	p1	reference group	p2	p3
Sex
male (n=533)	0.291803	0.852	0.315789	0.728	0.551		0.885246	0.419	0.850877	0.115	0.244
female (n=413)	0.284553		0.299401		0.744		0.906504		0.904192		0.937
Age (years)
≥60 (n=524)	0.277228	0.516	0.307692	0.955	0.448		0.887789	0.557	0.886878	0.365	0.974
<60 (n=422)	0.302419		0.310345		0.862		0.903226		0.856322		0.954
Pathological type
adenocarcinoma (n=932)	0.285451	0.349	0.311054	0.753	0.399		0.893186	1	0.876607	0.169	0.432
nonadenocarcinoma (n=14)	0.5		0.166667		0.301		1		0.666667		0.165
Stage of cancer
IIIB (n=54)	0.34375	0.478	0.363636	0.567	0.88		0.875	0.938	0.909091	0.851	1
IV (n=892)	0.285164		0.30563		0.508		0.895954		0.871314		0.254
Number of treatment lines
1 (n=506)	0.372937	0.000*	0.359606	0.08	0.76		0.930693	0.009*	0.931034	0.002*	0.988
2 (n=242)	0.197183		0.26		0.248		0.859155		0.82		0.41
≥3 (n=198)	0.169811		0.25		0.165		0.839623		0.804348		0.516
Combined with radiotherapy
with (n=103)	0.345455	0.326	0.479167	0.006*	0.168		0.909091	0.715	0.958333	0.059	0.445
without (n=843)	0.282258		0.285303		0.923		0.893145		0.861671		0.166
Combined treatment regimens
combined with chemotherapy (n=690)	0.271233	0.001*	0.273846	0.003*	0.939		0.887671	0.068	0.873846	0.387	0.575
combined with another targeted therapy (n=40)	0.333333		0.5		0.602		0.944444		0.75		0.277
combined with immunotherapy (n=8)	0		0.5		0.25		0.5		0.5		1
combined with chemotherapy and another targeted therapy (n=71)	0.529412		0.65		0.357		0.921569		0.9		1
combined with chemotherapy and immunotherapy (n=137)	0.225806		0.386364		0.048*		0.913978		0.886364		0.756
Dose intensity
low-dose (n≤7.5mg/kg) (n=461)	0.331858	0.061	0.297872	0.567	0.432		0.924779	0.055	0.880851	0.59	0.112
high-dose (7.5mg/kg<n≤15.0mg/kg) (n=485)	0.258462		0.325		0.125		0.873846		0.8625		0.727
Gene mutation type
No genetic mutation (n=448)	0.263158	0.196	0.328358	0.165	0.131		0.874494	0.169	0.905473	0.19	0.225
EGFR exon 18 point mutation (n=4)	1		0		0.333		1		1		NA
EGFR exon 19 deletion (n=162)	0.237624		0.245902		0.905		0.841584		0.885246		0.44
EGFR exon 20 insertion (n=24)	0.466667		0.222222		0.389		0.933333		0.666667		0.13
EGFR the L858R point mutation (n=209)	0.352		0.297619		0.412		0.902		0.79381		0.057
EGFR double mutation (n=10)	0.5		0		0.133		1		0.833333		1
ALK rearrangement (n=26)	0.285714		0.416667		0.683		1		0.916667		0.462
ROS1 rearrangement (n=8)	0.333333		1		0.429		0.833333		1		1
RET rearrangement (n=7)	0.333333		1		0.429		1		1		NA
BRAF mutation (n=6)	0		0		NA		1		1		NA_x000D_
HER2 mutation (n=9)	0.333333		0.666667		0.524		0.666667		1		0.5
KRAS mutation (n=26)	0.294118		0.444444		0.667		0.941176		1		1
MET aberration (n=7)	0		0		NA		1		1		NA
Brain metastases
with (n=209)	0.266667	0.549	0.235955	0.091	0.614		0.883333	0.645	0.797753	0.015*	0.089
without (n=737)	0.294664		0.330065		0.306		0.897912		0.895425		0.913
Liver metastases
with (n=136)	0.236111	0.292	0.28125	0.601	0.548		0.861111	0.319	0.875	0.967	0.926
without (n=810)	0.296451		0.314199		0.589		0.899791		0.873112		0.235
A history of hypertension
with (n=136)	0.308642	0.666	0.4	0.115	0.272		0.91358	0.55	0.909091	0.391	0.928
without (n=810)	0.285106		0.294118		0.78		0.891489		0.867647		0.3
*: p<0.05; ORR, overall/objective response rate; DCR, disease control rate;p1, hypothesis testing parameters within the biosimilar group;p2, hypothesis testing parameters within the referrence group;p3, hypothesis testing parameters between the biosimilar group and the referrence group.
