# Supplementary material for: Efficacy and safety of bevacizumab biosimilar compared with reference bevacizumab in locally advanced and advanced non-small cell lung cancer patients: A retrospective study
Source: Research Square preprint supplement (doi:10.21203/rs.3.rs-1943971/v1), 2022-08-11
Supplement: Supplementary file 2 [file 3049ac60676101e4974249a4.xlsx]

## Sheet: Sheet1
Table 4 Univariate analysis and multivariate analysis of factors affecting the progression-free survival (PFS）of all patients.
	Univariate analysis			Multivariate analysis
	HR (95%Cl)	P value		HR (95%Cl)	P value
Sex
male vs female	0.978 (0.846-1.130)	0.759
Age
≥60 years vs <60 years	1.013 (0.877-1.171)	0.862
Pathological type
adenocarcinoma vs nonadenocarcinoma	0.923 (0.494-1.723)	0.801
Stage of cancer
IIIB vs IV	0.777 (0.558-1.081)	0.135
Product
Bevacizumab biosimilar vs reference Bevacizumab	1.226 (1.061-1.417)	0.006		1.084 (0.932-1.260)	0.296
Dose intensity
low-dose vs high-dose	0.995 (0.862-1.149)	0.946
Combined with radiotherapy
yes vs no	0.743 (0.587-0.940)	0.014		0.778 (0.613-0.987)	0.039
Number of treatment lines
1	1	0		1	0.001
2	1.174 (0.988-1.394)			1.139 (0.957-1.355)
≥3	1.485 (1.237-1.7782)			1.407 (1.168-1.695)
Combined treatment regimens
combined with chemotherapy	1	0		1	0
combined with another targeted therapy	0.417 (0.617-3.089)			0.446 (0.284-0.700)
combined with immunotherapy	1.381 (0.267-0.519)			1.260 (0.559-2.841)
combined with chemotherapy and another targeted therapy	0.372 (0.267-0.519)			0.399 (0.295-0.560)
combined with chemotherapy and immunotherapy	0.847 (0.686-1.046)			0.835 (0.673-1.036)
Gene mutation type
no genetic mutation	1	0.627
EGFR exon 18 point mutation	0.607 (0.195-1.892)
EGFR exon 19 deletion	1.089 (0.892-1.330)
EGFR exon 20 insertion	0.985 (0.628-1.545)
EGFR the L858R point mutation	0.889 (0.735-1.074)
EGFR double mutation	1.093 (0.517-2.309)
ALK rearrangement	1.025 (0.660-1.592)
ROS1 rearrangement	0.308 (0.099-0.961)
RET rearrangement	0.723 (0.299-1.749)
BRAF mutation	1.226 (0.457-3.287)
HER2 mutation	0.662 (0.295-1.483)
KRAS mutation	0.856 (0.551-1.329)
MET aberration	0.855 (0.354-2.068)
Brain metastases
with vs without	1.137 (0.958-1.349)	0.142
Liver metastases
with vs without	1.309(1.077-1.592)	0.007		1.207 (0.990-1.470)	0.062
History of hypertension
with vs without	1.205（0.927-1.751）	0.03
