# Supplementary material for: Efficacy and safety of bevacizumab biosimilar compared with reference bevacizumab in locally advanced and advanced non-small cell lung cancer patients: A retrospective study
Source: Research Square preprint supplement (doi:10.21203/rs.3.rs-1943971/v1), 2022-08-11
Supplement: Supplementary file 3 [file 395ca6712d93d295b716ad9b.xlsx]

## Sheet: Sheet1
Table 1 clinical characteristics and treatment exposure of patients
	Total (n=946)	biosimilar group (n=551)	reference group (n=395)	P
Sex
male	533(56.34%)	305(55.35%)	228(57.72%)	0.469
female	413(43.66%)	246(44.65%)	167(42.48%)
Age (years)
≥60	524(55.39%)	303(54.99%)	221(55.95%)	0.77
<60	422(44.61%)	248(45.01%)	174(44.05%)
Pathological type
adenocarcinoma	932(98.52%)	543(98.55%)	389(98.48%)	0.933
nonadenocarcinoma	14(1.48%)	8(1.45%)	6(1.52%)
Stage of cancer
IIIB	54(5.71%)	32(5.81%)	22(5.57%)	0.876
IV	892(94.29%)	519(94.19%)	373(94.43%)
Gene mutation type
No genetic mutation	448(48.41%)	247(44.83%)	201(50.89%)	0.066
EGFR exon 18 point mutation	4(0.42%)	2(0.36%)	2(0.51%)	0.738
EGFR exon 19 deletion	162(17.12%)	101(18.33%)	61(15.44%)	0.245
EGFR exon 20 insertion	24(2.54%)	15(2.72%)	9(2.28%)	0.669
EGFR the L858R point mutation	209(21.04%)	125(22.69%)	84(21.27%)	0.604
EGFR double mutation	10(1.06%)	4(0.73%)	6(1.52%)	0.335
ALK rearrangement	26(2.75%)	14(2.54%)	12(3.04%)	0.645
ROS1 rearrangement	8(0.85%)	6(1.09%)	2(0.51%)	0.48
RET rearrangement	7(0.74%)	6(1.09%)	1(0.25%)	0.249
BRAF mutation	6(0.63%)	4(0.73%)	2(0.51%)	1
HER2 mutation	9(0.95%)	6(1.09%)	3(0.76%)	0.742
KRAS mutation	26(2.75%)	17(3.09%)	9(2.28%)	0.454
MET aberration	7(0.74%)	4(0.73%)	3(0.76%)	1
with brain metastases
yes	209(21.88%)	120(21.78%)	89(22.03%)	0.783
no	737(78.12%)	431(78.22%)	306(77.97%)
with liver metastases
yes	136(14.38%)	72(13.07%)	64(16.20%)	0.175
no	810(85.62%)	479(86.93%)	331(83.80%)
with a history of hypertension
yes	136(14.38%)	81(14.70%)	55(13.92%)	0.737
no	810(85.62%)	470(85.30%)	340(86.08%)
the mean duration of exposure(m）	7.54	6.98	8.31	0.121
the mean number of doses	7.64	7.53	7.81	0.364
the mean dose intensity(mg/kg)	8.07	8.37	7.64	0.823
