# Supplementary material for: Efficacy and safety of bevacizumab biosimilar compared with reference bevacizumab in locally advanced and advanced non-small cell lung cancer patients: A retrospective study
Source: Research Square preprint supplement (doi:10.21203/rs.3.rs-1943971/v1), 2022-08-11
Supplement: Supplementary file 4 [file 3b5cf9e1cf1bf6e60d2b7017.xlsx]

## Sheet: Sheet1
Tables 5 Treatment-related adverse events
	biosimilar group (n=551)			reference group (n=395)
Adverse events	any grade	Grade 3-4		any grade	Grade 3-4
General disorders
fatigue	56 (10.16%)	7 (1.27%)		47 (11.90%)	4 (1.01%)
fever	48 (8.71%)	18 (3.27%)		22 (5.57%)	9 (2.28%)
Infectious diseases
pneumonia	7 (1.27%)	2 (0.36%)		3 (0.76%)	0 (0.00%)
Blood and lymphatic system disorders
anemia	89 (16.15%)	2 (0.36%)		65 (16.46%)	2 (0.51%)
leucopenia	36 (6.53%)	3 (0.54%)		21 (5.32%)	4 (1.01%)
neutropenia	126 (22.87%)	67 (12.16%)		95 (24.05%)	42 (10.63%)
thrombocytopenia	56 (10.16%)	11 (2.00%)		43 (10.89%)	5 (1.27%)
Vascular disorders
hypertension	53 (9.62%)*	9 (1.63%)		23 (5.82%)*	2 (0.51%)
bleeding	39 (7.08%)	5 (0.91%)		29 (7.34%)	4 (1.01%)
thromboembolism	3 (0.54%)	0 (0.00%)		2 (0.51%)	0 (0.00%)
Urinary disorders
creatinine increased	10 (1.81%)	2 (0.36%)		9 (2.28%)	6 (1.52%)
proteinuria	5 (0.91%)	3 (0.54%)		6 (1.52%)	2 (0.51%)
Respiratory disorders
cough	2 (0.36%)	1 (0.18%)		0 (0.00%)	0 (0.00%)
Gastrointestinal disorders
diarrhea	3 (0.54%)	0 (0.00%)		1 (0.25%)	1 (0.25%)
nausea	71 (12.89%)	6 (1.09%)		42 (10.63%)	3 (0.76%)
vomiting	34 (6.17%)	3 (0.54%)		17 (4.30%)	3 (0.76%)
intestinal obstruction	2 (0.36%)	0 (0.00%)		0 (0.00%)	0 (0.00%)
elevated ALT or AST	14 (2.54%)	6 (1.09%)		7 (1.77%)	3 (0.76%)
Nervous system disorders
headache	13 (2.36%)	1 (0.18%)		11 (2.78%)	1 (0.25%)
paresthesia	1 (0.18%)	1 (0.18%)		1 (0.25%)	0 (0.00%)
Skin and subcutaneous tissue disorders
hair loss	81 (14.70%)	2 (0.36%)		54 (13.67%)	1 (0.25%)
rash	7 (1.27%)	0 (0.00%)		3 (0.76%)	2 (0.51%)
Musculoskeletal connective tissue disorders
joint pain	2 (0.36%)	1 (0.18%)		1 (0.25%)	0 (0.00%)
Metabolism and nutrition disorders
poor appetite	42 (7.62%)	1 (0.18%)		37 (9.37%)	2 (0.51%)
Total	421 (76.41%)	122 (22.14%)		283 (71.65%)	77 (19.49%)
Number of patients with an event (percent). *: p<0.05; ALT, alanine aminotransferase; AST, aspartate transaminase.
