# Supplementary material for: Efficacy and safety of bevacizumab biosimilar compared with reference bevacizumab in locally advanced and advanced non-small cell lung cancer patients: A retrospective study
Source: Research Square preprint supplement (doi:10.21203/rs.3.rs-1943971/v1), 2022-08-11
Supplement: Supplementary file 5 [file 47b9d32f5be4513e7e49c75f.xlsx]

## Sheet: Sheet1
Table 2 Comparison of overall response rate between biosimilar and referrence groups
	biosimilar group (n=551)	reference group (n=395)
Best overall response, n (%)
PR	159(28.9%)	122(30.9%)
SD	334(60.6%)	223(56.4%)
PD	58(10.5%)	50(12.7%)
ORR	0.289	0.309
95% exact CI	25.1%-32.7%	26.3%-35.5%
Treatment comparison (vs referrence bevacizumab group)
Unstratified ORR risk ratio	0.934
95% CI of risk ratio	0.767-1.138
90% CI of risk ratio	0.792-1.103
Unstratified ORR risk difference	-0.02
95% CI of difference	-0.118-0.035
90% CI of difference	-0.105-0.023
ORR, overall/objective response rate; PR, partial response; SD, stable disease; PD, progressive disease.
